# Supplementary material
Source: MDPI journal article supplement (https://www.mdpi.com/2073-4344/13/5/809)
Supplement: s1 [file s1 › catalysts-2301571-supplementary.pdf]

## Supplementary Information

### Sodium Methoxide Catalysed One-Pot Glycidol Synthesis via Trans-esterification between Glycerol and Dimethyl Carbonate

Elrasheed Elhaj<sup>1,2</sup>, Huajun Wang<sup>1,3</sup>, Enaam A. Al-Harthy<sup>4\*</sup>, Waseem A. Wani<sup>5</sup>, Sahar Sallam<sup>6</sup> Nasser Zouli<sup>7</sup> and Mohd Imran<sup>7</sup>

<sup>1</sup>Key Laboratory for Material Chemistry for Energy Conversion and Storage, Ministry of Education, School of Chemistry and Chemical Engineering, Huazhong University of Science and Technology, Wuhan 430074, P. R. China

<sup>2</sup>Chemical Engineering Department, Faculty of Engineering and Technical Studies, University of El Imam El Mahdi, P.O. Box 209, Kusti 27711, Sudan

<sup>3</sup>Hubei Key Laboratory of Material Chemistry & Service Failure, School of Chemistry and Chemical Engineering, Huazhong University of Science and Technology, Wuhan 430074, P R China

<sup>4</sup>University of Jeddah, College of Science, Department of Chemistry, Jeddah, Saudi Arabia

<sup>5</sup>Department of Chemistry, Government Degree College Tral, Kashmir, Jammu and Kashmir 192123, India

<sup>6</sup>Department of Chemistry, College of Science, Jazan University - P.O. Box 114, Jazan 45142, Saudi Arabia

<sup>7</sup>Department of Chemical Engineering, College of Engineering, Jazan University, P.O.Box 706, Jazan, 45142, Saudi Arabia

\* Correspondence: author email: ealharthy@uj.edu.sa

#### Gas Chromatogram:

A good separation peak is achieved at the given conditions for all components in the reaction mixture, see Figure S1.

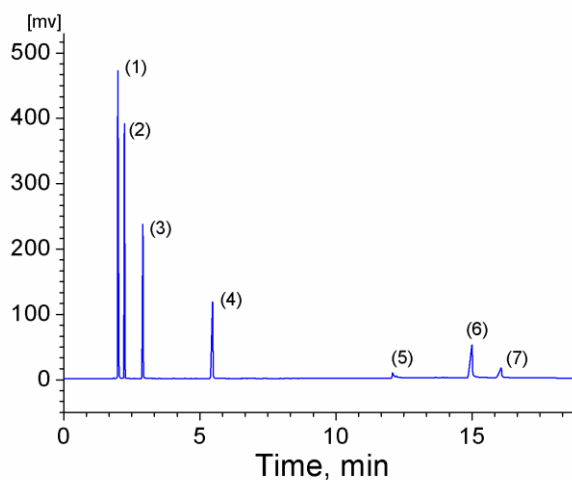

**Figure S1.** The gas chromatogram of the reaction mixture for synthesis of GD from GL and DMC using  $\text{CH}_3\text{ONa}$  as catalyst: (1) methanol; (2) DMC; (3) n-Butanol; (4) GD; (5) GL; (6) tetraethylene glycol; (7) GC.

**Calibration Curves:** The data is provided below in table S1, for effect of catalyst amount on the GL conversion and yields of GD and GC. The calibration curve is presented in Figure S2.

Catalyst amount of sodium methoxide(54.02g/mol)

Glycerol (92.08g/mol),  $=2/92.08 = 0.02172024$

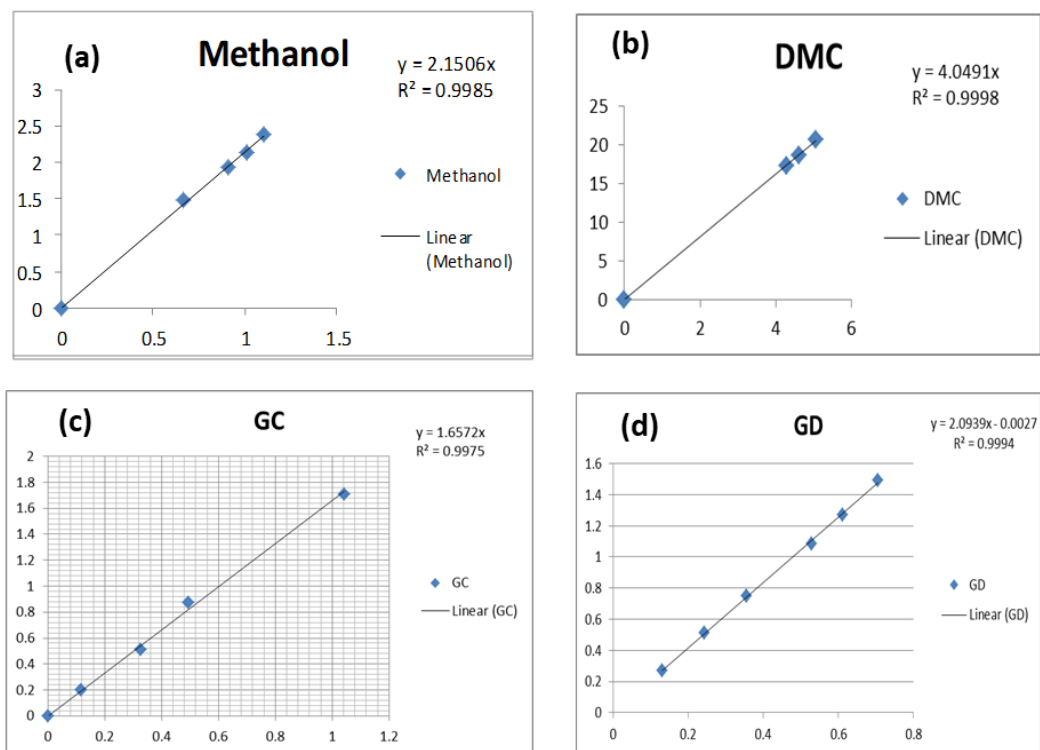

Figure S2: Calibration Curve (a) Methanol, (b) DMC, (c) GC and (d) GD

Table S1: Data for the effect of catalyst amount on the GL conversion and yields of GD and GC

| Catalyst %w | Cat. g | Cat. mol | Mol%  | Conversion % of GL | Yield of GD % | Yield of GC % |
|-------------|--------|----------|-------|--------------------|---------------|---------------|
| 1           | 0.02   | 0.00037  | 1.705 | 90                 | 38            | 52            |
| 2           | 0.04   | 0.00074  | 3.410 | 98                 | 70            | 28            |
| 3           | 0.06   | 0.00111  | 5.115 | 99                 | 75            | 24            |
| 4           | 0.08   | 0.00148  | 6.820 | 99                 | 70            | 29            |
| 5           | 0.10   | 0.00185  | 8.525 | 99                 | 84            | 15            |
